# Supplementary figures and images for: Effects of Reallocating Time Spent Engaging in Sedentary Behavior and Physical Activity on Mortality in Older Adults: ELSIA Study
Source: MDPI journal article supplement (doi:10.3390/ijerph18084336), 2021-04-19

BASELINE

FOLLOW-UP

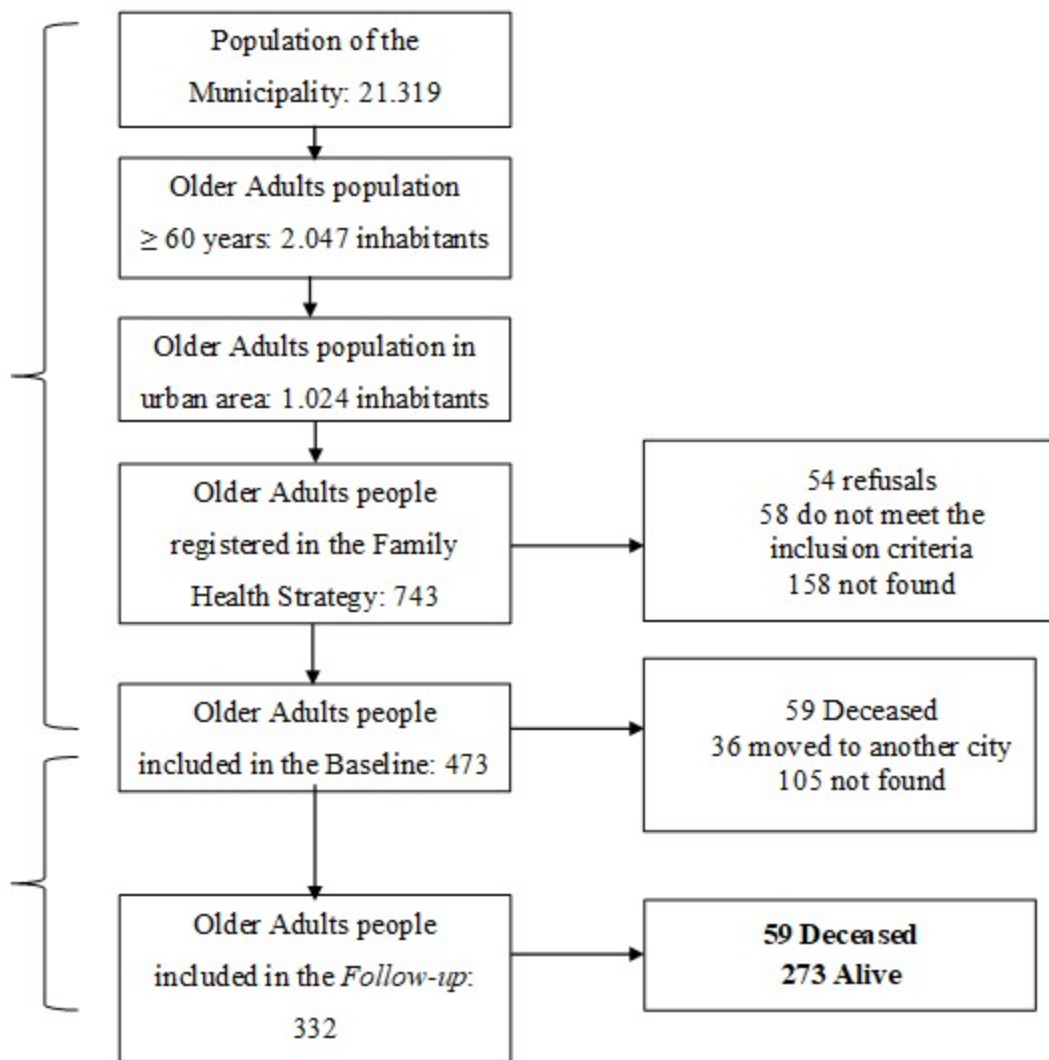

Supplement: s1 [file s1]
